# Supplementary material
Source: publisher figshare collection journal article supplement (https://geolsoc.figshare.com/ndownloader/files/8861140)
Supplement: Supplementary file 1 [file 8861140]

## Sheet: Table A.4 - Zircon Properties
Table A.4: Summary of zircon properties
Sample	Colour	Size (mm)	Aspect ratio (L:W)	Morphology	Internal zoning
DA14-110	colourless, pale-yellow	50-250	2:1 - 3:1	mostly subhedral	magmatic oscillatory zoning, broad irregular zoning, sector zoning, narrow dark overgrowths
DA14-118	clear, colourless,pale yellow	100-350	2:1 - 4:1	mostly subhedral	narrow to broad magmatic oscillatory zoning, dark inclusions, sector zoning, narrow dark overgrowths
DA14-119	clear, colourless	100-350	2:1 - 3:1	euhedral to mostly subhedral	narrow to broad magmatic oscillatory zoning, unzoned cores, dark inclusions, sector zoning, narrow dark overgrowths
DA14-127	clear, colourless	50-300	2:1 - 4:1	euhedral to mostly subhedral	faint broad zoning, magmatic oscillatory zoning
DA14-130	clear, colourless	50-200	1:1 - 2:1	mostly subhedral	broadly zoned crystal interiors, narrow magmatic oscillatory zoned outer domains, minor sector zoning, dark inclusions
